# Supplementary material
Source: HighWire-hosted journal article supplement (https://rc.rcjournal.com/highwire/filestream/21704/field_highwire_adjunct_files/0/AARC_2021_Staff_Comfort_Poster_Final.pdf)

# Improving Healthcare Staff Knowledge and Comfort in Caring for the Child with a Tracheostomy

Amanda Wise, Ashley Sparks, Denise Willis  
Arkansas Children's Hospital, Little Rock Arkansas

## Background

- Children with tracheostomies (trachs) with/without ventilator dependency are one of the most medically fragile, high-risk patient populations.
- Care practices should be consistent throughout different areas of a healthcare organization.
- Nurses and respiratory therapists who provide care at the bedside must remain proficient in trach care procedures.
- Admitting a trach-dependent child to an area where staff are not as comfortable or accustomed to providing routine trach care can potentially present safety concerns.
- We hypothesized that a multimodal educational intervention would increase healthcare provider comfort with trach management.

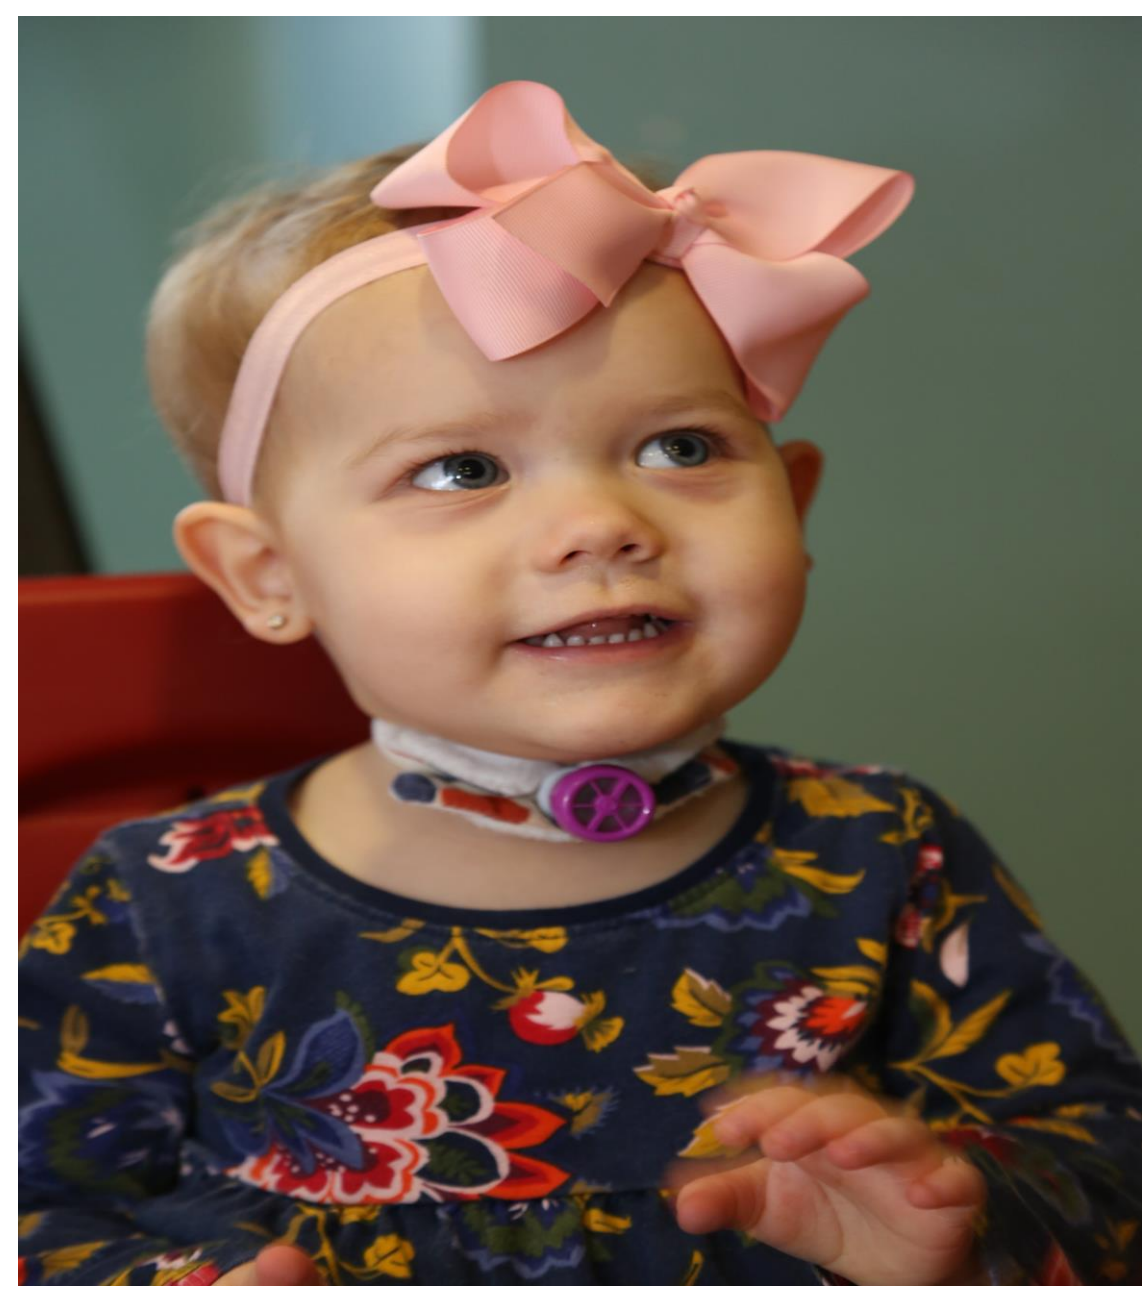

## Methods

- Registered nurses (RN) and respiratory therapists (RT) at one children's hospital were invited to anonymously complete a survey regarding staff comfort and knowledge in caring for trach-dependent children.
- The survey domains were comfort with caring for a child with a trach, caring for a child with a trach and ventilator, routine trach care (cleaning neck/area around the stoma, changing trach ties), routine trach tube change, and emergency trach tube change.
- A 5-point Likert scale used to evaluate comfort-related items.
- Educational interventions provided after initial survey included a presentation for staff and instructional videos about trach skills for caregivers and staff.
- The survey was repeated 6 months following interventions to evaluate change in staff comfort and knowledge.
- Descriptive statistics were used to summarize results.
- The Mann-Whitney test was used to compare data.
- $P < 0.05$  considered significant.

## Results

| Respondent Role and Work Area      | Pre Survey       | Post Survey        |
|------------------------------------|------------------|--------------------|
| <b>OVERALL</b>                     | <b>n=275 (%)</b> | <b>n = 142 (%)</b> |
| ICU (NICU, PICU, CVICU, step-down) | 76 (27%)         | 40 (28%)           |
| Designated ventilator ward         | 27 (10%)         | 22 (16%)           |
| Medical/Surgical ward              | 25 (9%)          | 13 (9%)            |
| Emergency Department               | 14 (5%)          | 7 (5%)             |
| Outpatient                         | 61 (22%)         | 29 (20%)           |
| Rotating staff                     | 36 (13%)         | 15 (11%)           |
| Other area                         | 36 (13%)         | 16 (11%)           |
| <b>RT</b>                          | <b>59 (21%)</b>  | <b>39 (27%)</b>    |
| ICU (NICU, PICU, CVICU, step-down) | 12 (4%)          | 8 (6%)             |
| Designated ventilator ward         | 3 (1%)           | 7 (5%)             |
| Medical/Surgical Ward              | 1 (<1%)          | 2 (1%)             |
| Emergency Department               | 4 (1%)           | 1 (<1%)            |
| Outpatient                         | 11 (4%)          | 7 (5%)             |
| Rotating staff                     | 21 (8%)          | 10 (7%)            |
| Other area                         | 7 (3%)           | 4 (3%)             |
| <b>RN</b>                          | <b>216 (79%)</b> | <b>103 (73%)</b>   |
| ICU (NICU, PICU, CVICU, step-down) | 64 (23%)         | 32 (23%)           |
| Designated ventilator ward         | 24 (9%)          | 15 (11%)           |
| Medical/Surgical Ward              | 24 (9%)          | 12 (8%)            |
| Emergency Department               | 10 (4%)          | 6 (4%)             |
| Outpatient                         | 50 (18%)         | 23 (16%)           |
| Rotating staff                     | 15 (5%)          | 7 (5%)             |
| Other area                         | 29 (11%)         | 8 (6%)             |

## Conclusions

- Increased comfort was reported for all aspects of care following the educational interventions.
- The most significant increase in comfort was with routine trach tube change.
- Overall, RTs were more comfortable with all areas as compared to nurses.
- The targeted educational interventions seemed beneficial in helping both nurses and respiratory therapists feel more comfortable in caring for a trach-dependent child.
- Ongoing education will be necessary to increase knowledge and comfort in performing life-saving maneuvers, including emergent trach change.

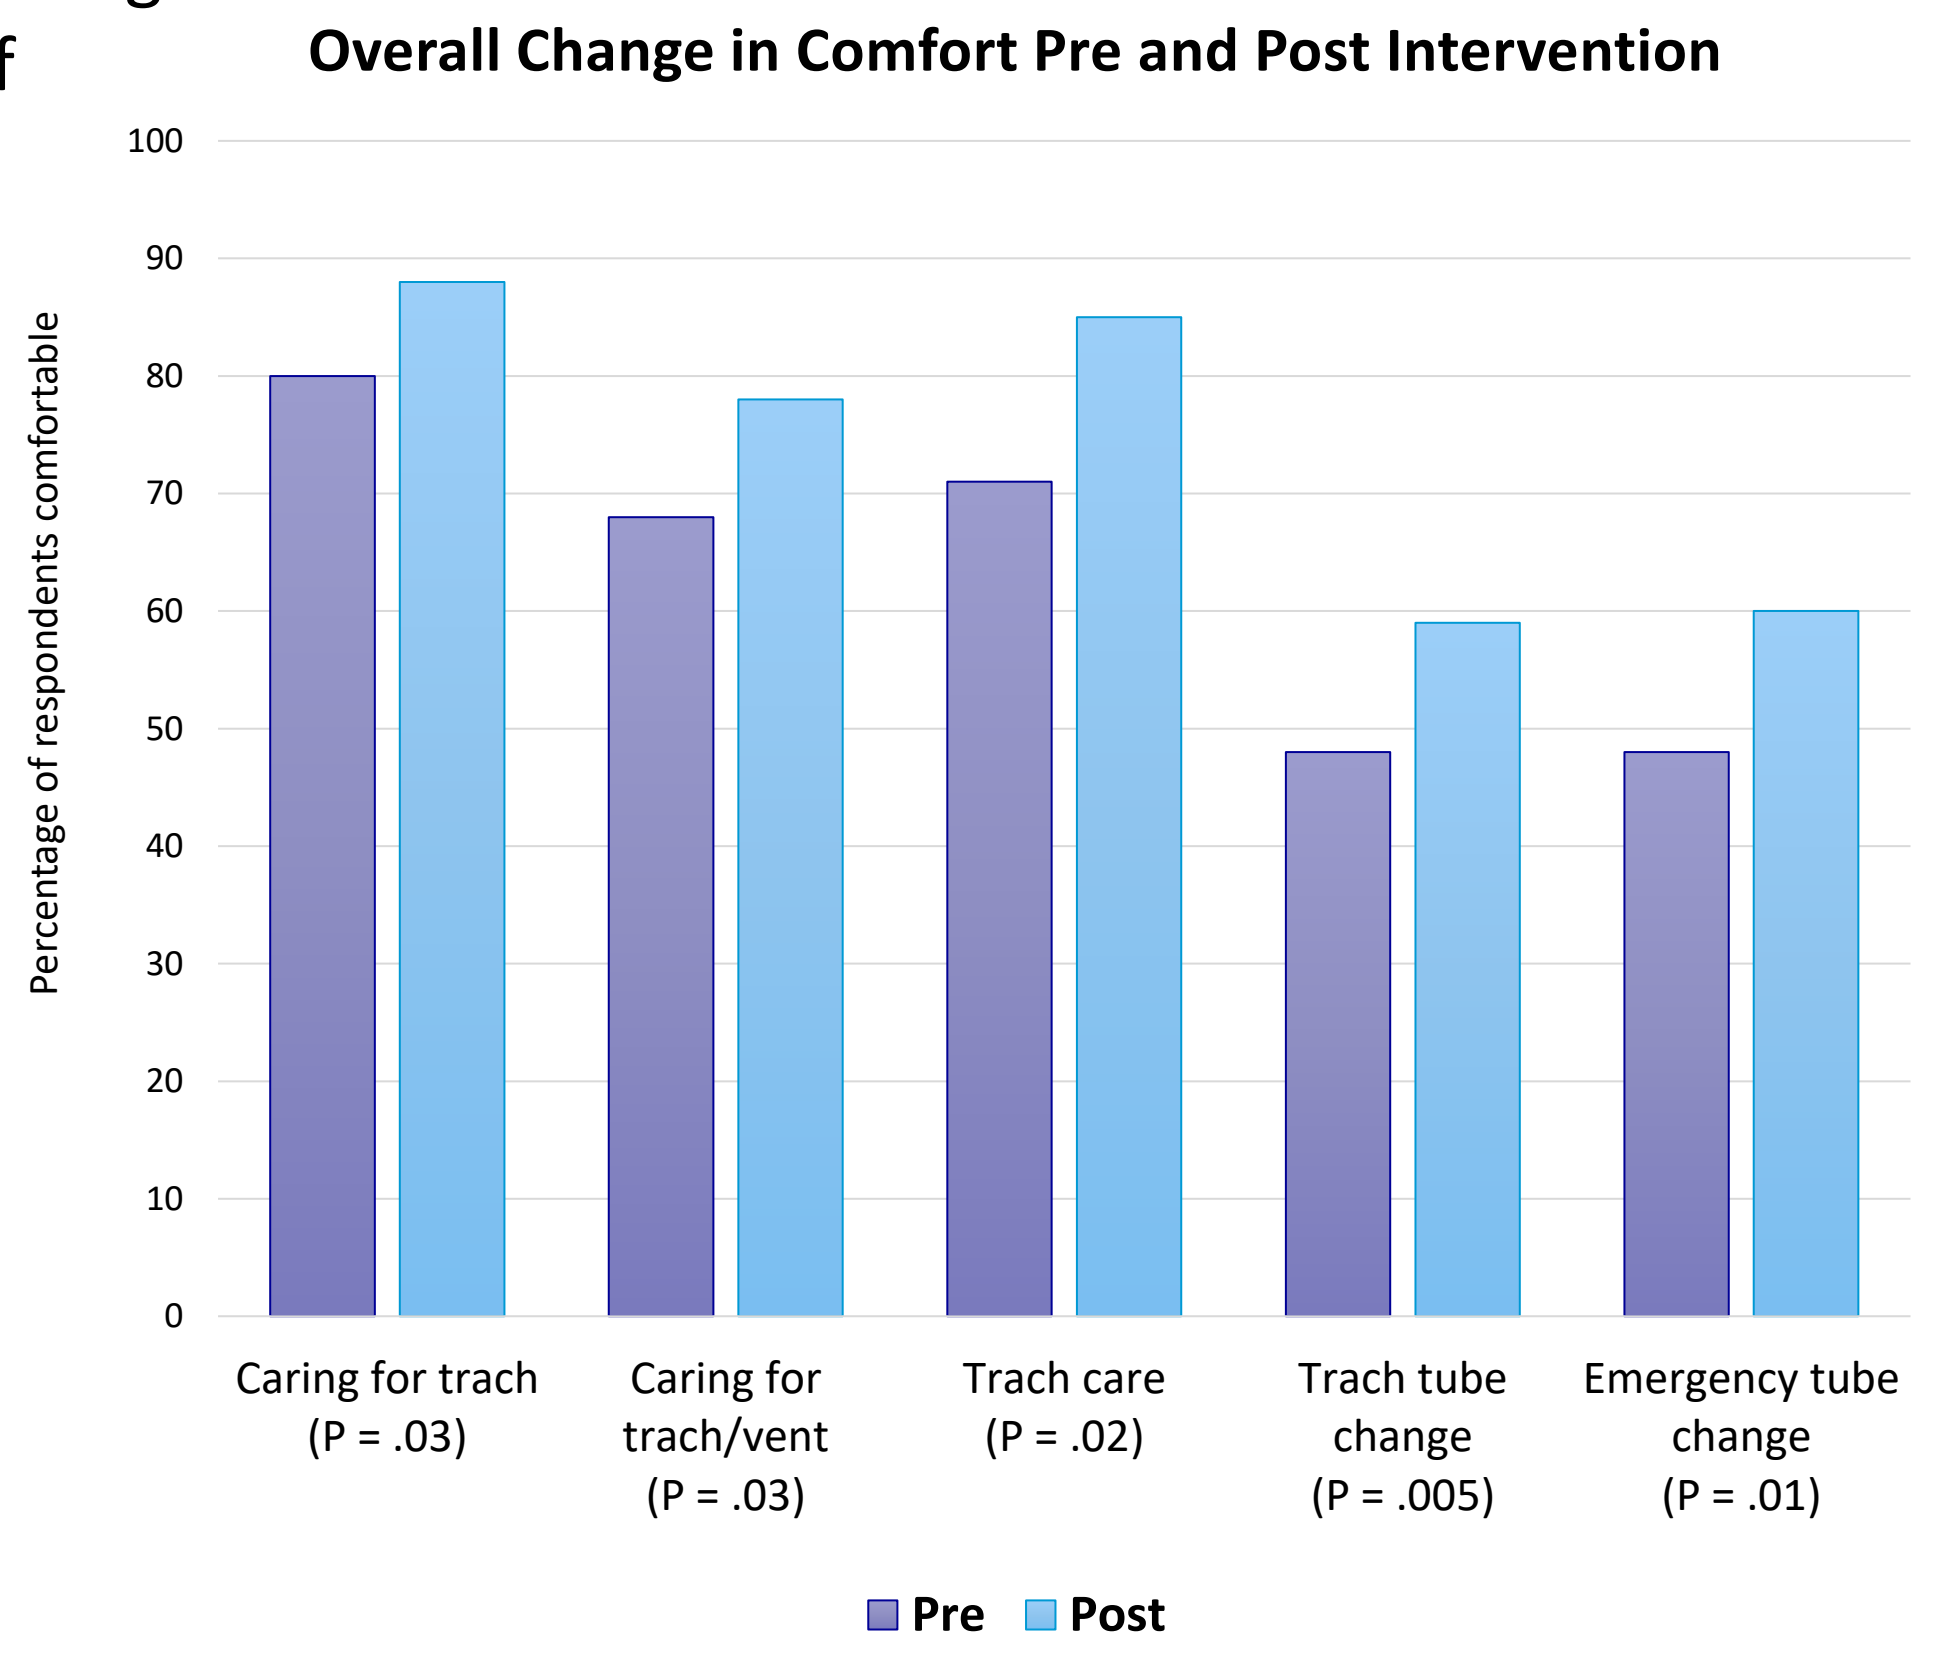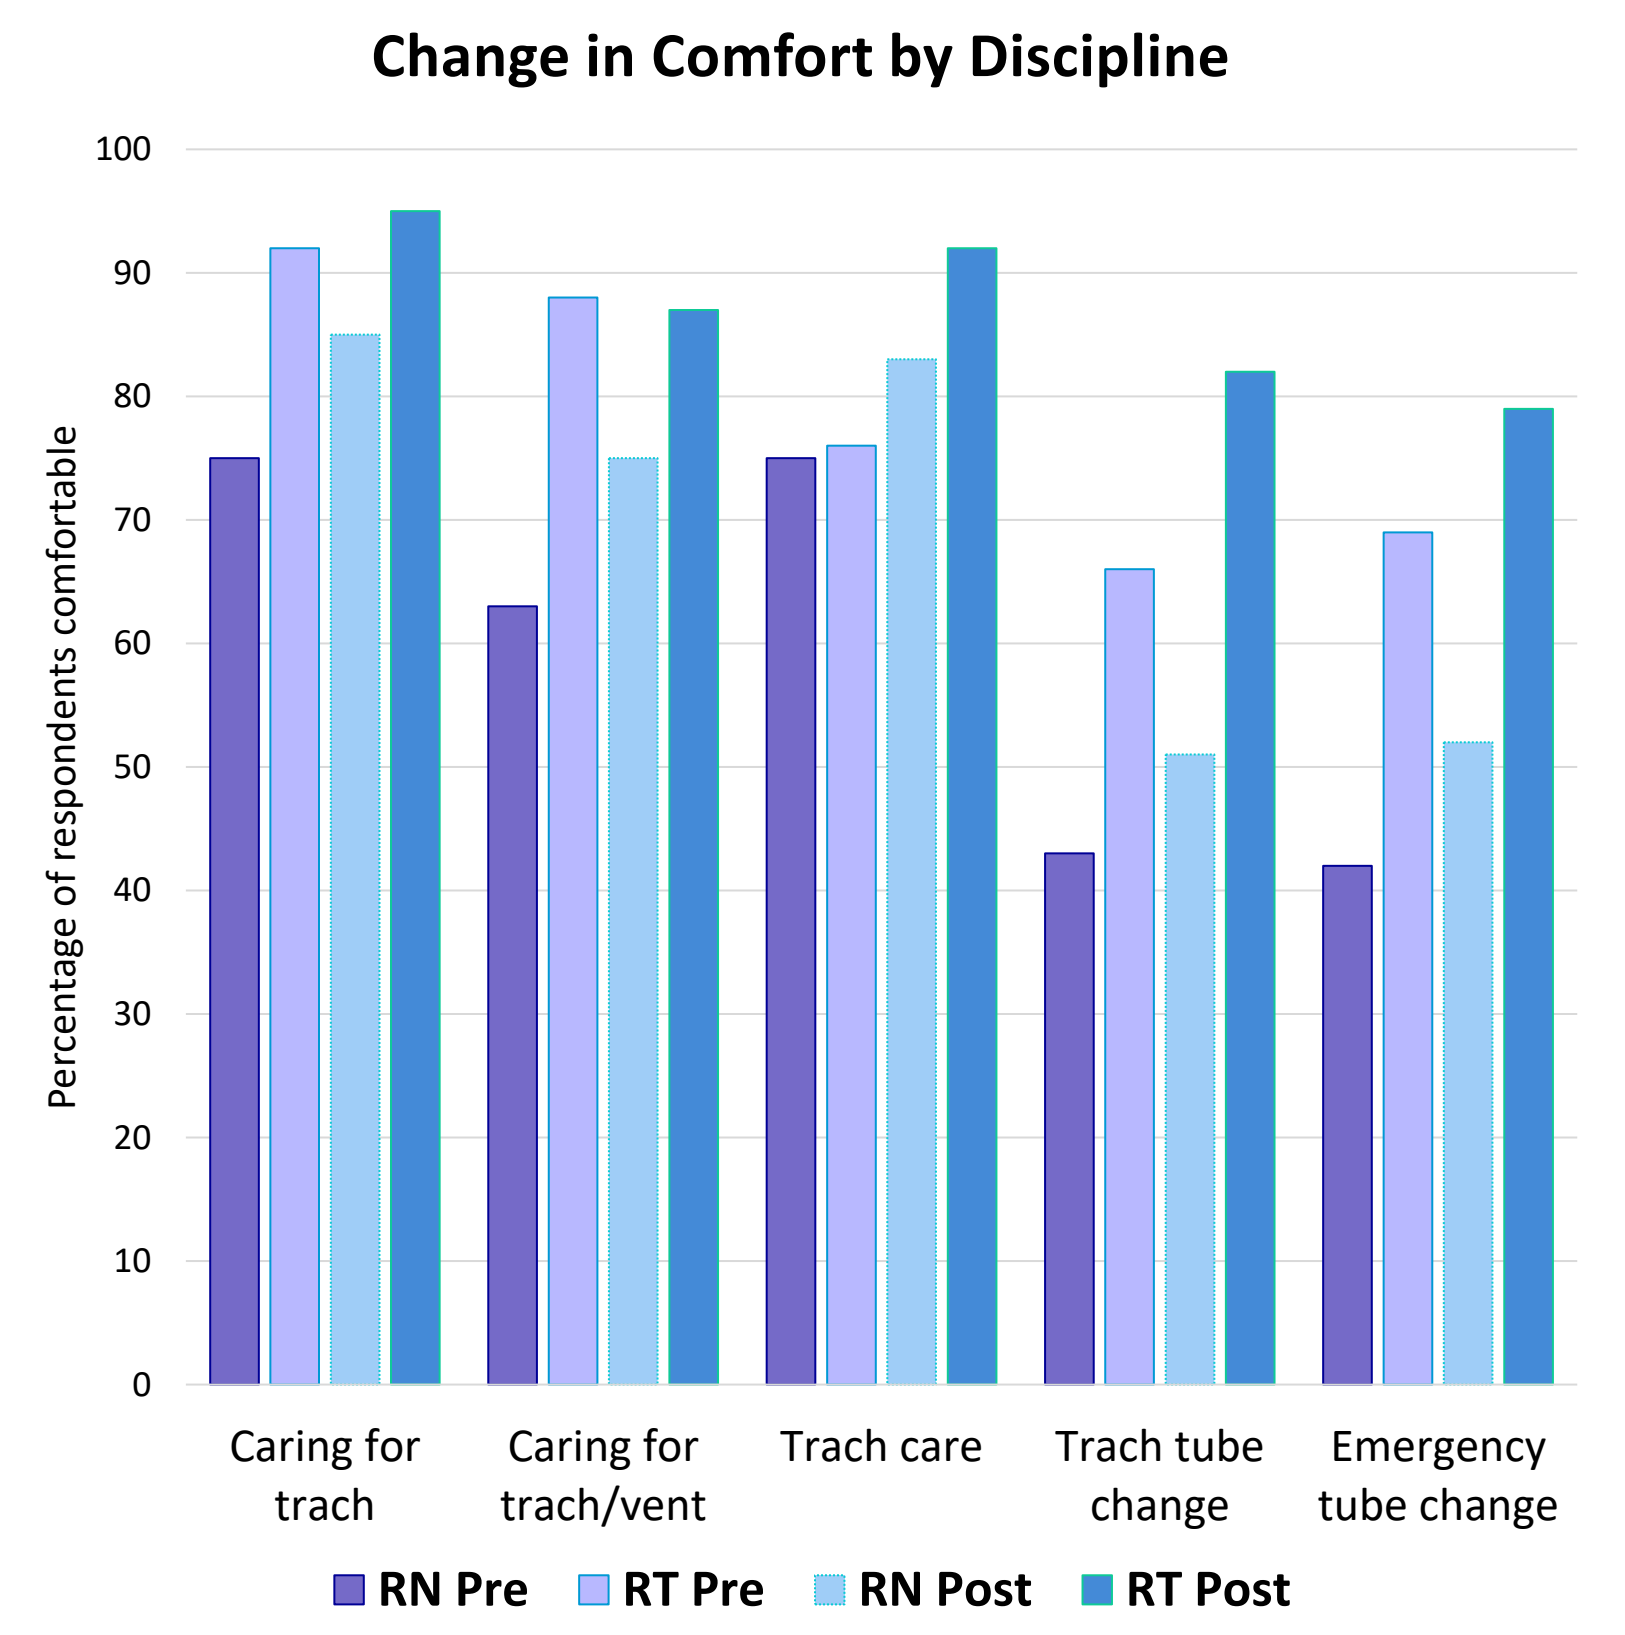

Supplement: AARC_2021_Staff_Comfort_Poster_Final.pdf [file AARC_2021_Staff_Comfort_Poster_Final.pdf]
